# Supplementary material for: Integrating comparative modeling and accelerated simulations reveals conformational and energetic basis of actomyosin force generation
Source: bioRxiv or medRxiv preprint supplement (doi:10.1101/2022.09.22.508219), 2023-01-10
Supplement: Supplementary file [file media-1.pdf]

## 15 Supporting Information Text

### 16 SI Materials and Methods

17 **Comparative modeling of the myosin-actin complex.** RosettaCM (1) breaks up multiple templates to produce hybridized  
18 structures that contain information from different structures. Here we applied the RosettaCM scripts published in Ref (2). A  
19 detailed tutorial with examples can be found in the SI of this paper. The protocol involves three steps: 1. align the target  
20 sequence to templates with Clustal Omega (3) and prepare input files; 2. use the partial thread application to create threaded  
21 pdb files for each target-template alignment; 3. generate ensembles of models using the RosettaCM hybridize protocol, which  
22 includes three stages of assembly and optimization (1).

23 The final assembly consisted of one human  $\beta$ -cardiac myosin (MYH7) and two adjacent  $\alpha$ -cardiac actin (ACTC1) monomers.  
24 For the PPS state modeling, PDBs 5N69 (PPS, bovine cardiac muscle) and 5H53 (rigor, rabbit skeletal muscle) were used as  
25 the templates. The cardiac myosin sequence was aligned to the two template sequences and the cardiac actin sequence was  
26 aligned to that of 5H53. After partial threading, the threaded pdb of 5N69 included all the atoms of the original pdb; the  
27 threaded pdb of 5H53 included the two actin monomers in contact with myosin, as well as the key myosin loop motifs at the  
28 interface. For the rigor state modeling, the myosin-actin complex in 5H53 was used as the template. For the ADP-bound  
29 modeling, the myosin-actin complex in 6C1D (myosin 1b) was used as the template. The PPS and ADP-bound states have  
30 ATP hydrolysis products bound at the active site, which were incorporated by adding the additional flags “-extra\_res\_fa” and  
31 “-extra\_res\_cen” in the RosettaCM command to load the full-atom and centroid mode ligand parameters. The Rosetta module  
32 molfile\_to\_params.py was used to generate the Pi ( $\text{H}_2\text{PO}_4^-$ ) and ADP parameters.

33 **MD simulation setup.** The top 35 conformations from each ensemble (PPS, ADP-bound, and rigor states) were selected for the  
34 following MD simulations. All the systems were solvated in a TIP3P water box with 150 mM NaCl. All the MD simulations  
35 were performed using the GPU-accelerated version of Amber18 (4, 5) with the ff14SB force field (6). The phosphate ion  
36 was modeled as  $\text{H}_2\text{PO}_4^-$ , which is the protonation state proposed for the product state (7, 8). Antechamber and the general  
37 AMBER force field (GAFF2) (9, 10) were applied to assign bonded and LJ parameters for Pi, whose partial charges were  
38 assigned according to Ref (11). An existing set of ADP parameters (12) and a multisite  $\text{Mg}^{2+}$  model (13) were used. Amber’s  
39 tleap program was employed to generate the input files.

40 **Simulation protocol.** For each MD system built on a Rosetta model, three independent replica runs were performed, as described  
41 below. Firstly energy minimization was carried out while constraining the protein positions with 1 kcal/(mol  $\text{\AA}^2$ ) harmonic  
42 constraints. With the same position constraints, a following 10 ns equilibration simulation was performed at 300 K. To maintain  
43 the temperature, Langevin dynamics with a friction coefficient of 1  $\text{ps}^{-1}$  was applied. Particle Mesh Ewald (14) was used for  
44 full-system periodic electrostatics while a 9  $\text{\AA}$  cutoff was applied to Lennard-Jones interactions. Bonds involving hydrogen  
45 atoms were constrained using SHAKE algorithm (15). The initial simulations filtered out a few systems that resulted in  
46 unstable dynamics. We then ran a subsequent GaMD simulation (16) for each MD system that passed the equilibration stage.

47 GaMD accelerates the sampling of protein conformational transitions by reducing the energy barrier with a harmonic boost  
48 potential (16). It has been successful in studying a few molecular machines, such as GPCR (17), CRISPR-Cas9 (18), and  
49  $\gamma$ -secretase (19). Here the GaMD module implemented in Amber (16) was employed to perform the simulations, which included  
50 a 10-ns conventional MD stage and a 25-ns GaMD stage in the isothermal-isobaric ensemble at 1 bar and 300 K. The 10-ns  
51 conventional MD was used to collect statistics for calculating GaMD acceleration parameters. In the GaMD stage, the total  
52 potential energy surface was smoothed by a boost potential that had a 6 kcal/mol upper limit of the standard deviation for  
53 accurate reweighting. MC barostat (20) was chosen for pressure control. The accumulated GaMD trajectories lasted 2.0  $\mu\text{s}$ , 2.1  
54  $\mu\text{s}$ , and 2.6  $\mu\text{s}$  for the pre-powerstroke, rigor, and ADP-bound states, respectively.

55 **Data analyses.** To obtain two-dimensional (2D) free energy profiles from the GaMD runs, we construct a 2D histogram with a  
56 total number of  $M$  bins, which cover the 2D space of interest. We define  $\delta_{m,i}$  as the indicator function (21) for the  $i$ th frame of  
57 the trajectory through

$$58 \quad \delta_{m,i} = \begin{cases} = 1 & \text{if frame } i \text{ falls in bin } m \\ = 0 & \text{otherwise} \end{cases} \quad [1]$$

59 The weighted histogram at bin  $m$  can be computed by

$$60 \quad H_m = \sum_{i=1}^N \delta_{m,i} e^{\beta \Delta V_i} \quad [2]$$

61 where  $\Delta V_i$  is the boost potential at the  $i$ th frame,  $N$  is the total number of frames, and  $\beta = (k_B T)^{-1}$ . The Maclaurin series  
62 expansion method was used to approximate the exponential term  $e^{\beta \Delta V_i}$  (21). One can then determine the 2D free energy  
63 profile via

$$64 \quad F_m = -k_B T \log H_m + F_0 \quad [3]$$

65 where  $F_0$  is arbitrary constant which is chosen here to set the minimum value in the free energy profile to zero.

66 Movies 1 and 2 were rendered with VMD (22).

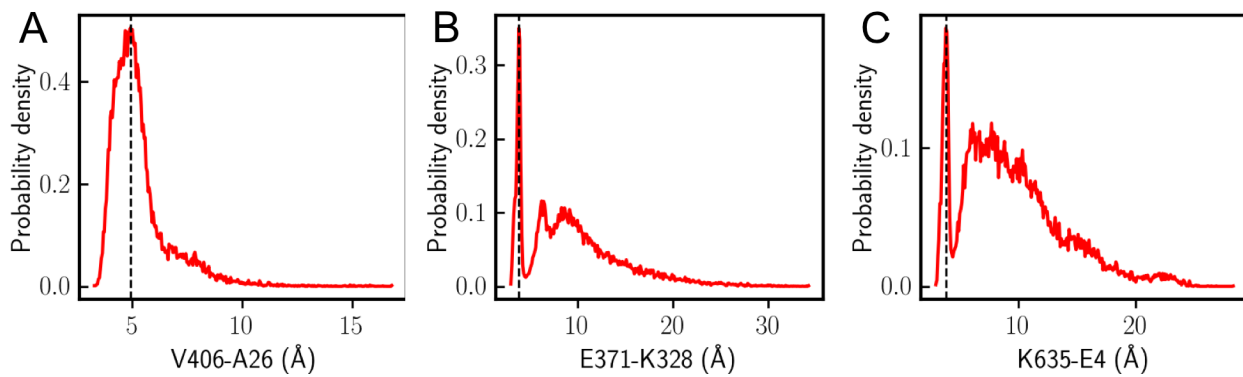

**Fig. S1.** Distance probability distributions of key residue pairs at the rigor state: A. the distance between the V406 and A26 (CB atoms); B. the distance between E371 (CD atom) and K328 (NZ atom); C. the distance between K635 (NZ atom) and E4 (CD atom, actin). The dashed black lines show the most probable distances.

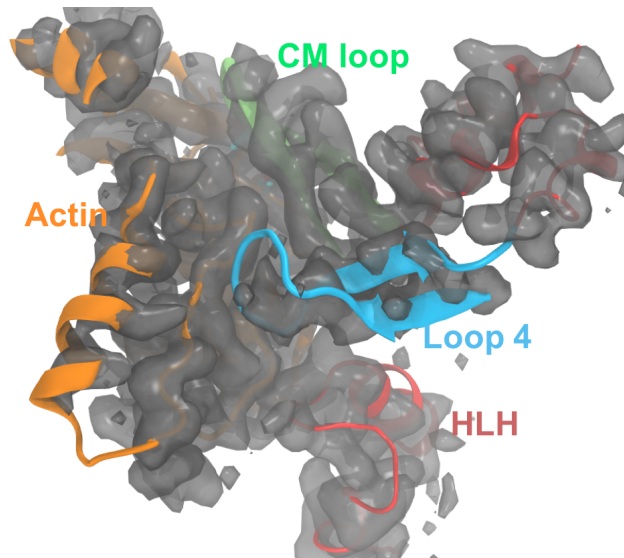

**Fig. S2.** Fitting key myosin-actin interface motifs into the cryo-EM density of rigor cardiac actomyosin (EMD-22335).

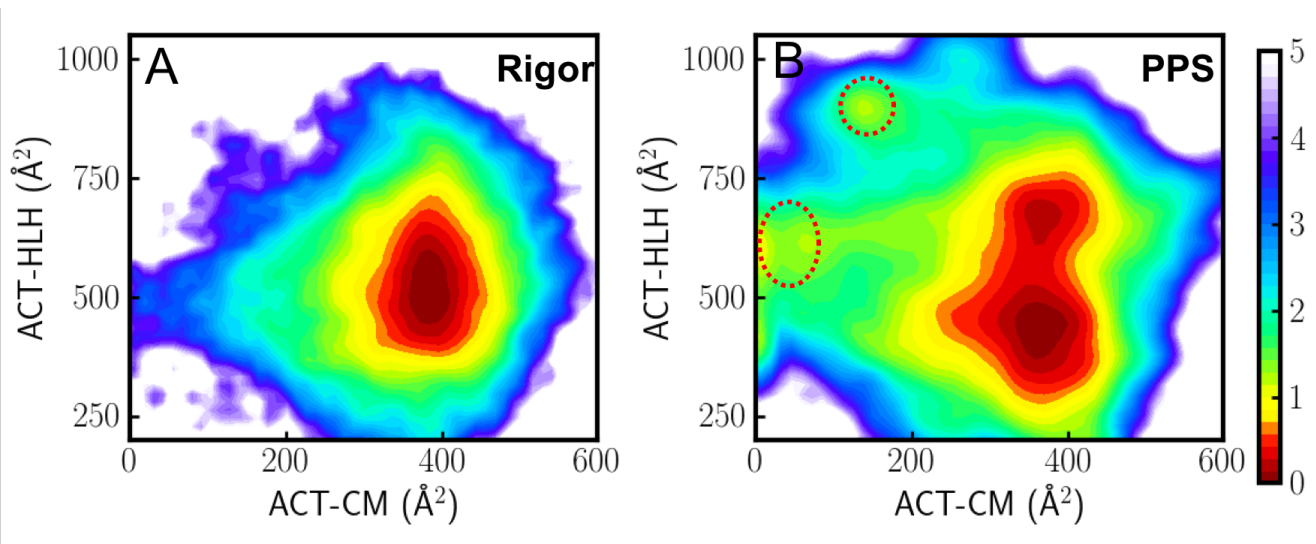

**Fig. S3.** 2D free energy profiles projected onto two contact area coordinates in the rigor (A) and PPS states (B). The contact area between actin and the CM loop (x-axis) is correlated with the contact area between actin and the HLH motif (y-axis). The red circles in the PPS landscape highlight two metastable states, in which the CM loop has relatively smaller contact areas with actin, while the HLH motif remains closely engaged with actin.

67 **Movie S1. The actomyosin dynamics at the rigor state. loop 2, CM loop, loop 4, myosin motor domain, and**  
68 **actin are colored blue, lime, cyan, red and gray, respectively.**

69 **Movie S2. A gate is formed between switch I (yellow) and switch II (purple). P loop is colored green. Key**  
70 **residues (e.g. the gating residues R243 and E466) and Pi/ADP are shown in licorice representation.**

## 71 **References**

- 72 1. Y Song, et al., High-resolution comparative modeling with rosetta. *Structure* **21**, 1735–1742 (2013).
- 73 2. BJ Bender, et al., Protocols for Molecular Modeling with Rosetta3 and RosettaScripts. *Biochemistry* **55**, 4748–4763  
74 (2016).
- 75 3. F Sievers, et al., Fast, scalable generation of high-quality protein multiple sequence alignments using clustal omega. *Mol.*  
76 *Syst. Biol.* **7**, 539 (2011).
- 77 4. D Case, et al., Amber 2018. *Univ. California, San Francisco* (2018).
- 78 5. R Salomon-Ferrer, DA Case, RC Walker, An overview of the amber biomolecular simulation package. *WIREs Comput.*  
79 *Mol. Sci.* **3**, 198–210 (2013).
- 80 6. JA Maier, et al., ff14SB: Improving the Accuracy of Protein Side Chain and Backbone Parameters from ff99SB. *J. Chem.*  
81 *Theory Comput.* **11**, 3696–3713 (2015).
- 82 7. FA Kiani, S Fischer, Catalytic strategy used by the myosin motor to hydrolyze atp. *Proc. Natl. Acad. Sci.* **111**, E2947–E2956  
83 (2014).
- 84 8. ML Mugnai, D Thirumalai, Step-Wise Hydration of Magnesium by Four Water Molecules Precedes Phosphate Release in  
85 a Myosin Motor. *The J. Phys. Chem. B* **125**, 1107–1117 (2021).
- 86 9. J Wang, RM Wolf, JW Caldwell, PA Kollman, DA Case, Development and testing of a general amber force field. *J.*  
87 *Comput. Chem.* **25**, 1157–1174 (2004).
- 88 10. X He, VH Man, W Yang, TS Lee, J Wang, A fast and high-quality charge model for the next generation general AMBER  
89 force field. *The J. Chem. Phys.* **153**, 114502 (2020).
- 90 11. S Kashfolgheta, A Vila Verde, Developing force fields when experimental data is sparse: Amber/gaff-compatible parameters  
91 for inorganic and alkyl oxoanions. *Phys. Chem. Chem. Phys.* **19**, 20593–20607 (2017).
- 92 12. KL Meagher, LT Redman, HA Carlson, Development of polyphosphate parameters for use with the AMBER force field. *J.*  
93 *Comput. Chem.* **24**, 1016–1025 (2003).
- 94 13. A Saxena, D Sept, Multisite Ion Models That Improve Coordination and Free Energy Calculations in Molecular Dynamics  
95 Simulations. *J. Chem. Theory Comput.* **9**, 3538–3542 (2013).
- 96 14. T Darden, D York, L Pedersen, Particle mesh Ewald: An  $N^2 \log(N)$  method for Ewald sums in large systems. *The J.*  
97 *Chem. Phys.* **98**, 10089–10092 (1993).
- 98 15. S Miyamoto, PA Kollman, Settle: An analytical version of the SHAKE and RATTLE algorithm for rigid water models. *J.*  
99 *Comput. Chem.* **13**, 952–962 (1992).
- 100 16. Y Miao, VA Feher, JA McCammon, Gaussian Accelerated Molecular Dynamics: Unconstrained Enhanced Sampling and  
101 Free Energy Calculation. *J. Chem. Theory Comput.* **11**, 3584–3595 (2015).
- 102 17. Y Miao, JA McCammon, Mechanism of the G-protein mimetic nanobody binding to a muscarinic G-protein-coupled  
103 receptor. *Proc. Natl. Acad. Sci.* **115**, 3036–3041 (2018).
- 104 18. G Palermo, Y Miao, RC Walker, M Jinek, JA McCammon, Crispr-cas9 conformational activation as elucidated from  
105 enhanced molecular simulations. *Proc. Natl. Acad. Sci.* **114**, 7260–7265 (2017).
- 106 19. A Bhattarai, et al., Mechanism of Tripeptide Trimming of Amyloid  $\beta$ -Peptide 49 by  $\gamma$ -Secretase. *J. Am. Chem. Soc.* **144**,  
107 6215–6226 (2022).
- 108 20. J Åqvist, P Wennerström, M Nervall, S Bjelic, BO Brandsdal, Molecular dynamics simulations of water and biomolecules  
109 with a Monte Carlo constant pressure algorithm. *Chem. Phys. Lett.* **384**, 288–294 (2004).
- 110 21. LCT Pierce, R Salomon-Ferrer, C Augusto F. de Oliveira, JA McCammon, RC Walker, Routine Access to Millisecond  
111 Time Scale Events with Accelerated Molecular Dynamics. *J. Chem. Theory Comput.* **8**, 2997–3002 (2012).
- 112 22. W Humphrey, A Dalke, K Schulten, VMD – Visual Molecular Dynamics. *J. Mol. Graphics* **14**, 33–38 (1996).
